# Supplementary material for: Characterization of Aurintricarboxylic Acid (ATA) Interactions with Plasma Transporter Protein and SARS-CoV-2 Viral Targets: Correlation of Functional Activity and Binding Energetics
Source: MDPI journal article supplement (doi:10.3390/life12060872), 2022-06-10
Supplement: s1 [file s1]

# **Characterization of Aurintricarboxylic Acid (ATA) Interactions with Plasma Transporter Protein and SARS-CoV-2 Viral Targets: Correlation of Functional Activity and Binding Energetics**

Conceição A. Minetti<sup>1,\*,#</sup>, David P. Remeta<sup>1,\*,#</sup>, Keiji Hashimoto<sup>2</sup>, Radha Bonala<sup>2</sup>, Rajesh Chennamshetti<sup>2</sup>, Xingyu Yin<sup>2</sup>, Miguel Garcia-Diaz<sup>2</sup>, Arthur P. Grollman<sup>2,3</sup>, Francis Johnson<sup>2,4,\*</sup>, and Viktoriya S. Sidorenko<sup>2,\*</sup>

<sup>1</sup> Department of Chemistry and Chemical Biology; Rutgers - The State University of New Jersey; New Jersey, 08854; USA

<sup>2</sup> Department of Pharmacological Sciences, State University of New York at Stony Brook; Stony Brook; New York, 11794; USA

<sup>3</sup> Department of Medicine, State University of New York at Stony Brook; Stony Brook; New York, 11794; USA

<sup>4</sup> Department of Chemistry, State University of New York at Stony Brook; Stony Brook; New York, 11794; USA

## **SUPPORTING INFORMATION**

## SUPPLEMENTARY FIGURES

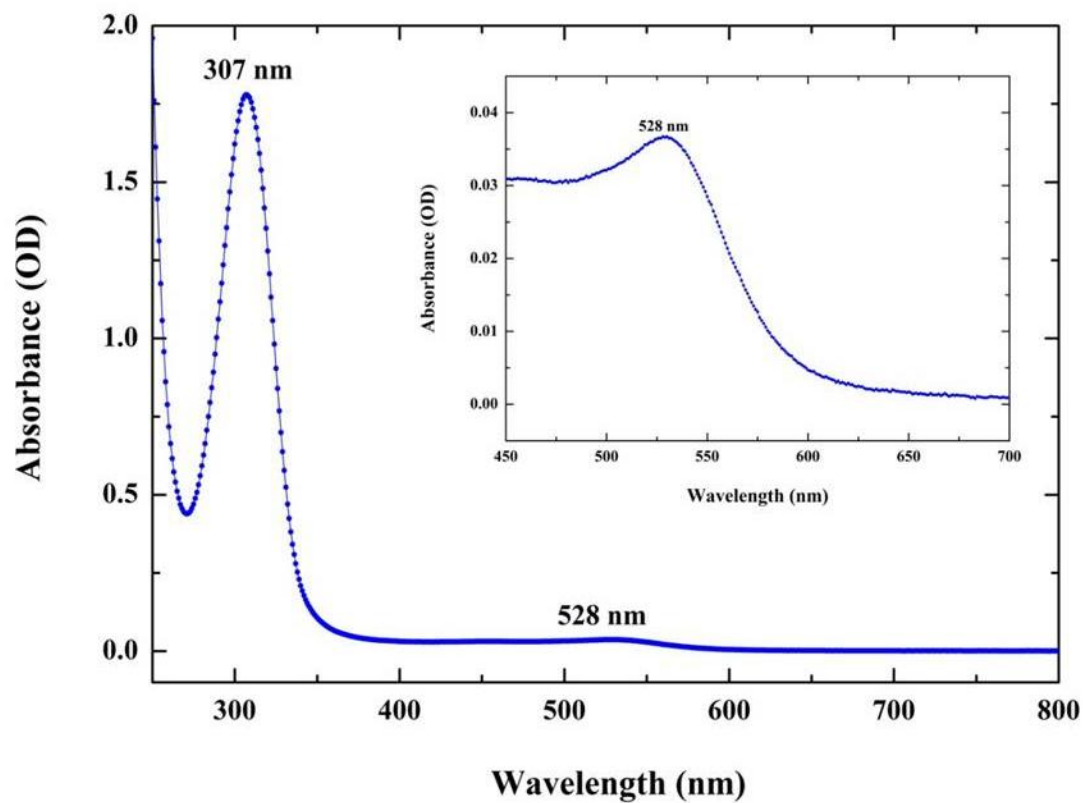

**Figure S1. UV/Vis Absorbance Spectrum of an ATA Polymer Standard (2.0 mM) Revealing Major and Minor Peaks at 310 and 530 nm, respectively.** The minor absorption band is expanded in the visible range (inset) to improve visualization.

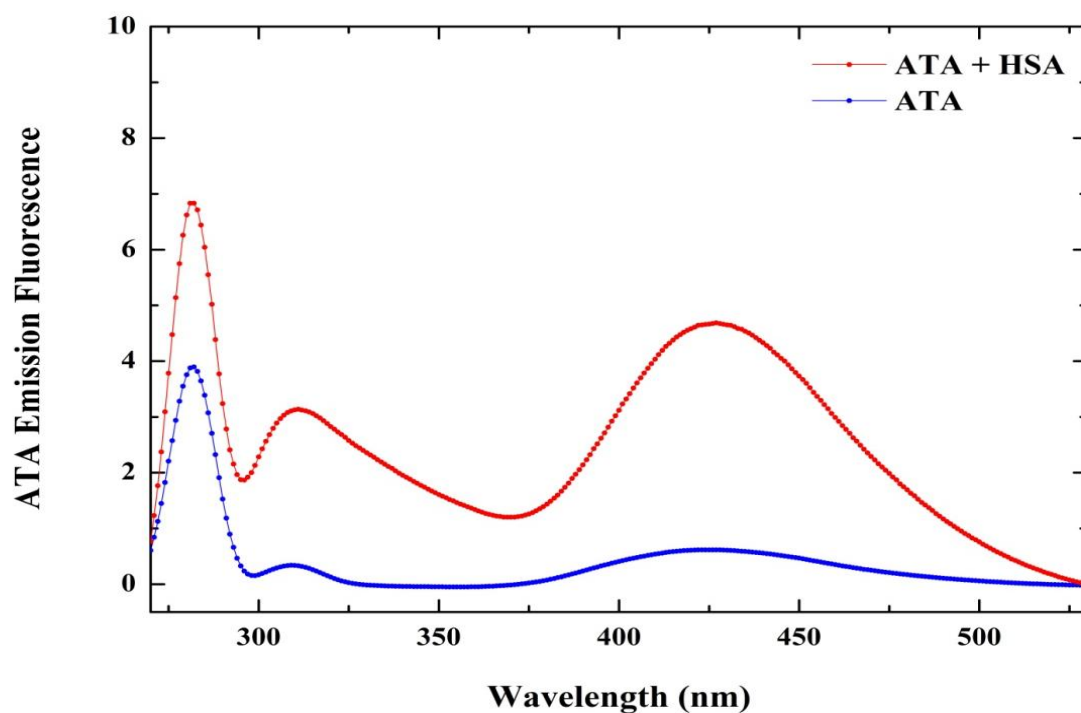

**Figure S2. Impact of HSA on ATA Emission Fluorescence upon Excitation of Aromatic Residues at 280 nm.** The enhanced ATA fluorescence intensity presumably arises as a consequence of energy transfer which can be exploited to assess ATA interactions at protein binding sites.

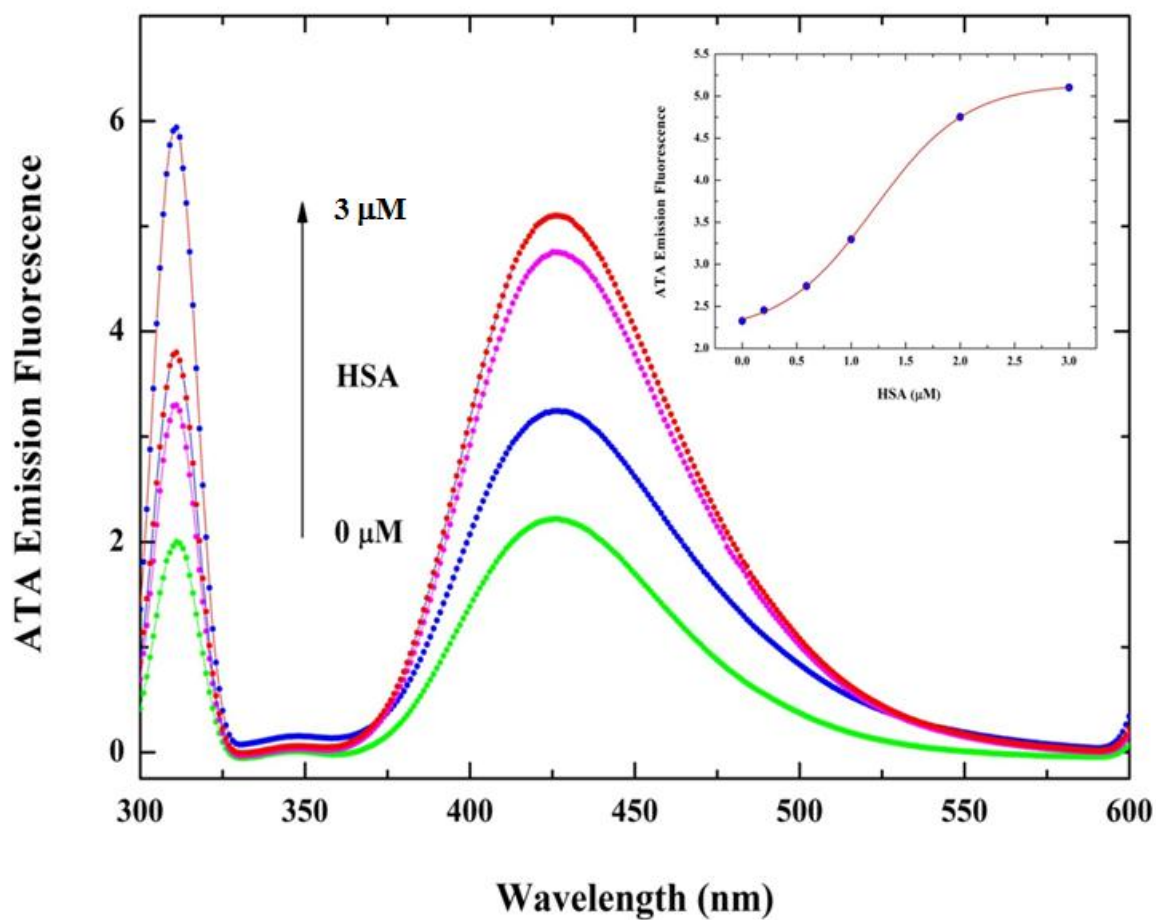

**Figure S3. Fluorescence Intensity of ATA ( $\lambda_{\text{Exc}}$  310 nm) in the Presence of Increasing HSA Concentrations Ranging from 0 to 3  $\mu\text{M}$ . Inset: Fluorescence binding profile monitored at 425 nm as a function of HSA concentration.**

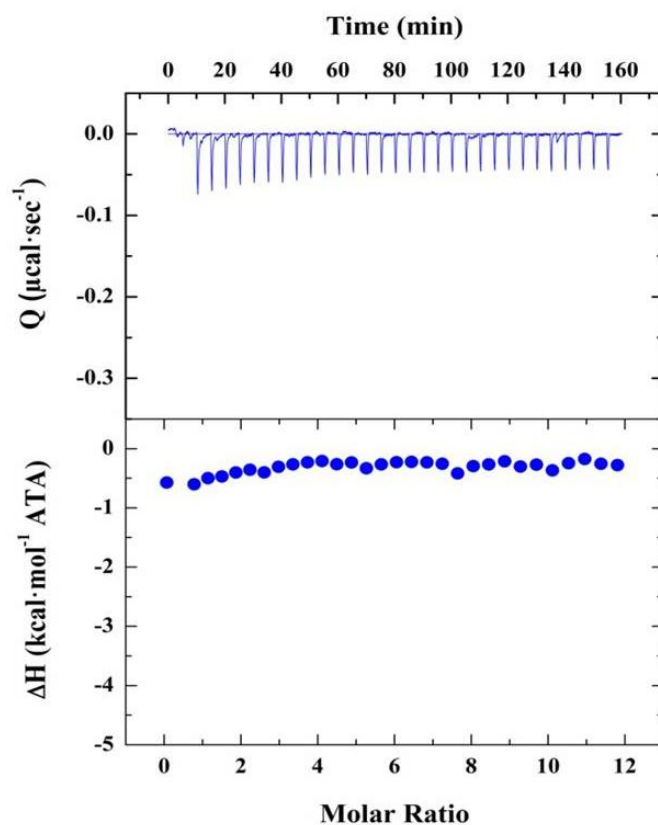

**Figure S4. ITC Profiles Monitoring ATA Dilution into Dialysate.** The binding isotherms are acquired at 25.0 °C in 10 mM sodium phosphate (pH 7.4). Titration of ATA into dilaysate is reflected in the thermogram (top panel), integrated peak areas (blue circles) (bottom panel). The dilution of ATA into dialysate is characterized by negligible reaction heats reflecting the absence of aggregated species.

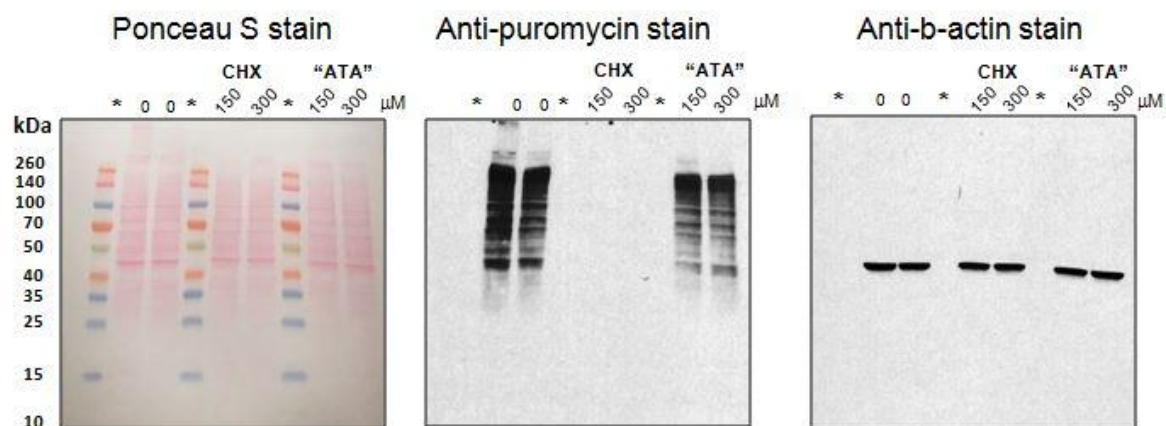

**Figure S5. Full Size Immunoblotting Images Corresponding to Figure 8.** The nitrocellulose membrane has been stained with Ponceau S to visualize total protein (left), anti-puromycin antibodies (center), and anti-β-actin antibodies (right).

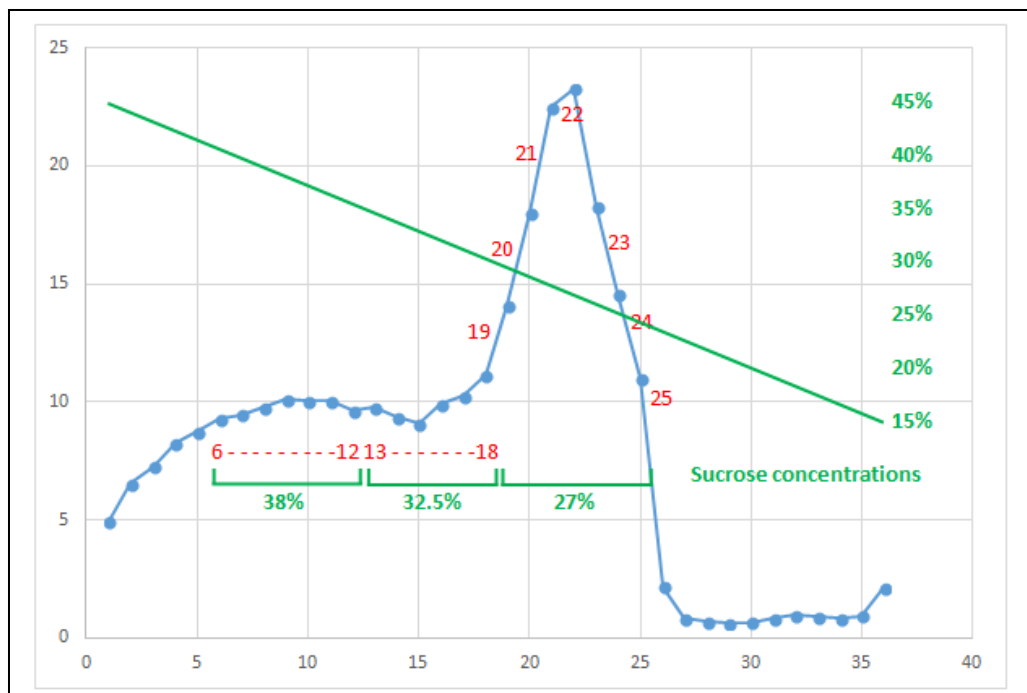

**Figure S6. Fractions of Yeast 80S Ribosomes Obtained via Sucrose Gradient Centrifugation.** Fractions 6-12 are polysomes while fractions 19-25 were combined and designated as 80S ribosomes. The latter were subsequently concentrated by sucrose cushion ultracentrifugation for thermodynamic studies.

## Supplementary Tables

|                    | b-actin densitometry        |         |     |     |          |                     |                       |           |            |
|--------------------|-----------------------------|---------|-----|-----|----------|---------------------|-----------------------|-----------|------------|
| Sample ID          | Area                        | Mean    | Min | Max | Max-Mean | Background adjusted |                       |           |            |
| Background         | 0.035                       | 226.886 | 204 | 252 | 25.114   |                     |                       |           |            |
| Vero E6 no drugs_1 | 0.035                       | 123.147 | 0   | 248 | 124.853  | 99.739              |                       |           |            |
| Vero E6 no drugs_2 | 0.035                       | 132.429 | 0   | 245 | 112.571  | 87.457              |                       |           |            |
| Vero E6 CHX 150 uM | 0.035                       | 136.791 | 0   | 255 | 118.209  | 93.095              |                       |           |            |
| Vero E6 CHX 300 uM | 0.035                       | 133.097 | 0   | 248 | 114.903  | 89.789              |                       |           |            |
| Vero E6 ATA 150 uM | 0.035                       | 129.246 | 0   | 255 | 125.754  | 100.64              |                       |           |            |
| Vero E6 ATA 300 uM | 0.035                       | 129.697 | 0   | 248 | 118.303  | 93.189              |                       |           |            |
|                    |                             |         |     |     |          |                     |                       |           |            |
|                    | Anti-puromycin densitometry |         |     |     |          |                     |                       |           |            |
| Sample ID          | Area                        | Mean    | Min | Max | Max-Mean | Background adjusted | Anti-puro/<br>b-actin | Reference | % activity |
| Background         | 0.376                       | 226.557 | 180 | 255 | 28.443   |                     |                       |           |            |
| Vero E6 no drugs_1 | 0.376                       | 126.97  | 6   | 247 | 120.03   | 91.587              | 0.918266676           | 0.910424  | 100.8615   |
| Vero E6 no drugs_2 | 0.376                       | 147.62  | 8   | 255 | 107.38   | 78.937              | 0.902580697           |           | 99.13853   |
| Vero E6 CHX 150 uM | 0.376                       | 229.941 | 200 | 255 | 25.059   | -3.384              | -0.036349965          |           | -3.99264   |
| Vero E6 CHX 300 uM | 0.376                       | 229.785 | 202 | 255 | 25.215   | -3.228              | -0.035950952          |           | -3.94882   |
| Vero E6 ATA 150 uM | 0.376                       | 171.641 | 17  | 252 | 80.359   | 51.916              | 0.515858506           |           | 56.66137   |
| Vero E6 ATA 300 uM | 0.376                       | 172.519 | 17  | 255 | 82.481   | 54.038              | 0.579875307           |           | 63.69291   |

**Table S1.** Densitometry results for **Figure 8** and Supplementary **Figure S6**.



| Fraction | A260   | Fraction | A260   | Fraction | A260   |
|----------|--------|----------|--------|----------|--------|
| 1        | 4.988  | 13       | 9.770  | 25       | 11.027 |
| 2        | 6.525  | 14       | 9.344  | 26       | 2.191  |
| 3        | 7.273  | 15       | 9.072  | 27       | 0.843  |
| 4        | 8.254  | 16       | 9.922  | 28       | 0.716  |
| 5        | 8.728  | 17       | 10.258 | 29       | 0.666  |
| 6        | 9.315  | 18       | 11.159 | 30       | 0.680  |
| 7        | 9.473  | 19       | 14.110 | 31       | 0.860  |
| 8        | 9.787  | 20       | 18.004 | 32       | 0.999  |
| 9        | 10.137 | 21       | 22.519 | 33       | 0.934  |
| 10       | 10.083 | 22       | 23.284 | 34       | 0.857  |
| 11       | 10.046 | 23       | 18.272 | 35       | 0.950  |
| 12       | 9.663  | 24       | 14.594 | 36       | 2.150  |

**Table S2.** Optical Density of Yeast 80S Ribosome Fractions via Sucrose Gradient Centrifugation.
